# Supplementary material
Source: PubMed Central journal article supplement (PMC4544188)
Supplement: i1552-5783-56-9-5533-s01.pdf [file i1552-5783-56-9-5533-s01.pdf]

| Participant | Diagnosis                     | Treatment administered    | Best-Corrected Visual Acuity (logMAR)       | MSE Refractive Error (dioptre sphere)     | Horizontal motor fusion amplitude (prism dioptres) | Stereoacuity (arc seconds)             | Near angle of deviation (prism dioptres) |
|-------------|-------------------------------|---------------------------|---------------------------------------------|-------------------------------------------|----------------------------------------------------|----------------------------------------|------------------------------------------|
| 001†        | Strabismic amblyopia (LE)*    | Occlusion, glasses, botox | Amblyopic Eye: 0.000<br>Fellow Eye: -0.100  | Amblyopic Eye: +1.50<br>Fellow Eye: +2.50 | Not measurable                                     | Not measurable                         | 15                                       |
| 002†        | Microtropic amblyopia (RE)*   | Occlusion, glasses        | Amblyopic Eye: 0.000<br>Fellow Eye: -0.060  | Amblyopic Eye: +3.50<br>Fellow Eye: +3.50 | Positive (base out): 20<br>Negative (base in): 1   | Frisby: 75<br>Preschool<br>Randot: 400 | 6                                        |
| 003†        | Microtropic amblyopia (LE)    | Occlusion, glasses        | Amblyopic Eye: 0.060<br>Fellow Eye: -0.200  | Amblyopic Eye: +0.00<br>Fellow Eye: -0.63 | Positive (base out): 35<br>Negative (base in): 18  | Frisby: 75<br>Preschool<br>Randot: 400 | 16                                       |
| 004†        | Anisometropic amblyopia (LE)  | Occlusion, glasses        | Amblyopic Eye: 0.240<br>Fellow Eye: -0.040  | Amblyopic Eye: +3.38<br>Fellow Eye: +3.50 | Positive (base out): 35<br>Negative (base in): 14  | Frisby: 40<br>Preschool<br>Randot: 100 | 6                                        |
| 005†        | Anisometropic amblyopia (RE)* | Occlusion, glasses        | Amblyopic Eye: 0.000<br>Fellow Eye: -0.060  | Amblyopic Eye: -0.50<br>Fellow Eye: -0.88 | Positive (base out): 40<br>Negative (base in): 12  | Frisby: 55<br>Preschool<br>Randot: 100 | 6                                        |
| 006†        | Mixed amblyopia (RE)          | Occlusion, glasses        | Amblyopic Eye: 0.625<br>Fellow Eye: -0.100  | Amblyopic Eye: +2.88<br>Fellow Eye: +1.75 | Not measurable                                     | Not measurable                         | 16                                       |
| 007         | Mixed amblyopia (LE)          | No treatment              | Amblyopic Eye: 1.00<br>Fellow Eye: -0.180   | Amblyopic Eye: +6.13<br>Fellow Eye: +5.13 | Not measurable                                     | Not measurable                         | 12                                       |
| 008         | Microtropic amblyopia (RE)*   | Occlusion, glasses        | Amblyopic Eye: -0.300<br>Fellow Eye: -0.300 | Amblyopic Eye: +0.63<br>Fellow Eye: +0.63 | Positive (base out): 30<br>Negative (base in): 12  | Frisby: 20<br>Preschool<br>Randot: 60  | 3                                        |
| 009†        | Mixed amblyopia (LE)          | Occlusion, glasses        | Amblyopic Eye: 0.500<br>Fellow Eye: 0.140   | Amblyopic Eye: +4.75<br>Fellow Eye: +8.51 | Not measurable                                     | Not measurable                         | 12                                       |
| 010†        | Microtropic amblyopia (LE)    | No treatment              | Amblyopic Eye: 0.460<br>Fellow Eye: 0.060   | Amblyopic Eye: -1.50<br>Fellow Eye: -2.75 | Positive (base out): 35<br>Negative (base in): 14  | Not measurable                         | 6                                        |

|     |                               |                             |                                            |                                             |                                                   |                                                    |    |
|-----|-------------------------------|-----------------------------|--------------------------------------------|---------------------------------------------|---------------------------------------------------|----------------------------------------------------|----|
| 011 | Anisometropic amblyopia (RE)* | Glasses                     | Amblyopic Eye: 0.000<br>Fellow Eye: -0.100 | Amblyopic Eye: +0.88<br>Fellow Eye: +0.38   | Positive (base out): 25<br>Negative (base in): 18 | Frisby: 30<br>Preschool<br>Randot: 100             | 4  |
| 012 | Anisometropic amblyopia (RE)* | Glasses, occlusion          | Amblyopic Eye: 0.200<br>Fellow Eye: 0.040  | Amblyopic Eye: +3.50<br>Fellow Eye: +0.63   | Positive (base out): 16<br>Negative (base in): 12 | Frisby: 75<br>Preschool<br>Randot: 60              | 2  |
| 013 | Microtropic amblyopia (RE)    | Occlusion                   | Amblyopic Eye: 0.060<br>Fellow Eye: -0.200 | Amblyopic Eye: Plano<br>Fellow Eye: Plano   | Positive (base out): 20<br>Negative (base in): 4  | Not measurable                                     | 2  |
| 014 | Microtropic amblyopia (RE)*   | Glasses, occlusion          | Amblyopic Eye: 0.140<br>Fellow Eye: 0.040  | Amblyopic Eye: -3.13<br>Fellow Eye: -2.25   | Positive (base out): 8<br>Negative (base in): 16  | Frisby: 40<br>Preschool<br>Randot: 40              | 2  |
| 015 | Microtropic amblyopia (LE)*   | Glasses, occlusion          | Amblyopic Eye: 0.060<br>Fellow Eye: -0.080 | Amblyopic Eye: +1.00<br>Fellow Eye: +0.25   | Positive (base out): 16<br>Negative (base in): 8  | Not measurable                                     | 6  |
| 016 | Mixed amblyopia (LE)          | Glasses, occlusion, surgery | Amblyopic Eye: 0.825<br>Fellow Eye: 0.000  | Amblyopic Eye: +4.75<br>Fellow Eye: +4.38   | Not measurable                                    | Not measurable                                     | 10 |
| 017 | Microtropic amblyopia (RE)    | Glasses, occlusion          | Amblyopic Eye: 0.460<br>Fellow Eye: 0.000  | Amblyopic Eye: +4.625<br>Fellow Eye: +5.000 | Positive (base out): 30<br>Negative (base in): 16 | Frisby: 600<br>Preschool<br>Randot: Not measurable | 8  |
| 018 | Microtropic amblyopia (LE)*   | Perceptual learning         | Amblyopic Eye: 0.060<br>Fellow Eye: -0.040 | Amblyopic Eye: +0.75<br>Fellow Eye: +0.75   | Positive (base out): 14<br>Negative (base in): 18 | Frisby: 20<br>Preschool<br>Randot: 100             | 2  |
| 019 | Strabismic amblyopia (LE)     | Glasses, surgery            | Amblyopic Eye: 0.200<br>Fellow Eye: -0.060 | Amblyopic Eye: +0.38<br>Fellow Eye: +0.63   | Not measurable                                    | Not measurable                                     | 10 |
| 020 | Strabismic amblyopia (RE)     | Glasses, occlusion, surgery | Amblyopic Eye: 0.920<br>Fellow Eye: 0.000  | Amblyopic Eye: +0.75<br>Fellow Eye: Plano   | Not measurable                                    | Not measurable                                     | 8  |
| 021 | Microtropic amblyopia (RE)    | No treatment                | Amblyopic Eye: 1.000<br>Fellow Eye: -0.100 | Amblyopic Eye: +3.50<br>Fellow Eye: +0.25   | Positive (base out): 25<br>Negative (base in): 8  | Frisby: 600<br>Preschool<br>Randot: Not measurable | 2  |

|     |                               |                             |                                             |                                           |                                                   |                                        |   |
|-----|-------------------------------|-----------------------------|---------------------------------------------|-------------------------------------------|---------------------------------------------------|----------------------------------------|---|
| 022 | Microtropic amblyopia (RE)*   | Glasses, occlusion          | Amblyopic Eye: 0.100<br>Fellow Eye: -0.020  | Amblyopic Eye: +1.25<br>Fellow Eye: +1.63 | Positive (base out): 25<br>Negative (base in): 8  | Frisby: 40<br>Preschool<br>Randot: 100 | 4 |
| 023 | Microtropic amblyopia (LE)    | Glasses, possibly occlusion | Amblyopic Eye: 0.800<br>Fellow Eye: -0.100  | Amblyopic Eye: +0.75<br>Fellow Eye: +0.25 | Positive (base out): 14<br>Negative (base in): 8  | Not measurable                         | 4 |
| 024 | Anisometropic amblyopia (LE)* | Glasses                     | Amblyopic Eye: -0.060<br>Fellow Eye: -0.200 | Amblyopic Eye: +3.25<br>Fellow Eye: +4.63 | Positive (base out): 18<br>Negative (base in): 16 | Frisby: 30<br>Preschool<br>Randot: 60  | 4 |

**Supplementary Table. Clinical characteristics of amblyopic participants recruited to the study.**

\* No longer amblyopic as a result of treatment administered

† Participated in the subsequent study involving repeated measurements of their perceptual visual distortions over time.

Grey shaded rows indicate dichoptic global distortion and/or uncertainty was not significantly different from the participant's non-dichoptic measurement and therefore participant was classified as not having significant perceptual visual distortions.

Note that for microtropic subjects the near angle of deviation also includes any latent component due to the dissociative nature of the prism cover test.
